# Supplementary material for: Nitrosation of N-methylhydroxylamine by nitroprusside. A kinetic and mechanistic study
Source: Royal Society of Chemistry journal article supplement (doi:10.1039/b805329d), 2008-01-01
Supplement: b805329d.pdf [file b805329d.pdf]

# Nitrosation of N-Methylhydroxylamine by Nitroprusside. A Kinetic and Mechanistic Study

María Marta Gutiérrez,<sup>a</sup> Graciela Beatriz Alluisetti,<sup>a</sup> José Antonio Olabe<sup>b</sup> and Valentín Tomás Amorebieta<sup>\*a</sup>

Amorebieta<sup>\*a</sup>

<sup>a</sup>Department of Chemistry, Facultad de Ciencias Exactas y Naturales, Universidad Nacional de Mar del Plata, Funes y Roca, Mar del Plata B7602AYL, Argentina. E-mail, [amorebie@mdp.edu.ar](mailto:amorebie@mdp.edu.ar) and <sup>b</sup>Department of Inorganic, Analytical and Physical Chemistry and INQUIMAE, CONICET, Facultad de Ciencias Exactas y Naturales, Universidad de Buenos Aires, Pabellón 2, Ciudad Universitaria, C1428EHA, Buenos Aires, Argentina

**Figure 1.** ESR spectrum of the  $[\text{Fe}(\text{CN})_4\text{NO}]^{2-}$  radical, formed through cyanide labilization of  $[\text{Fe}(\text{CN})_5\text{NO}]^{3-}$  intermediate, in aqueous solution, room temperature, pH 9.3, 25 mM SNP, 20 mM MeHA, 200 mM isonicotinamide.  $a_{\text{N}}(\text{NO}) = 1.47$  mT and  $g = 2.0293$  vs tempo.

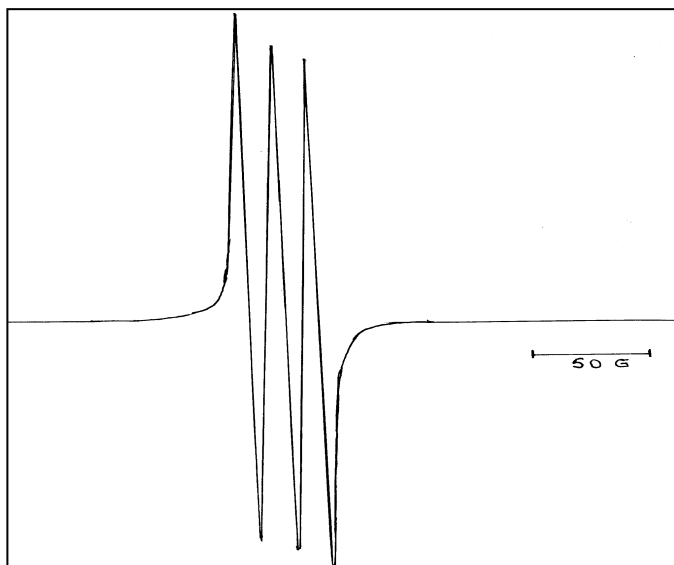

**Figure 2.** Eyring plot of the average rate constants,  $k_{\text{exp}}$ , at various temperatures. 25 mM MeHA; 0.2 mM SNP; 100 mM isonicotinamide; pH 8.0,  $I = 1$  M (NaCl).<sup>a</sup>

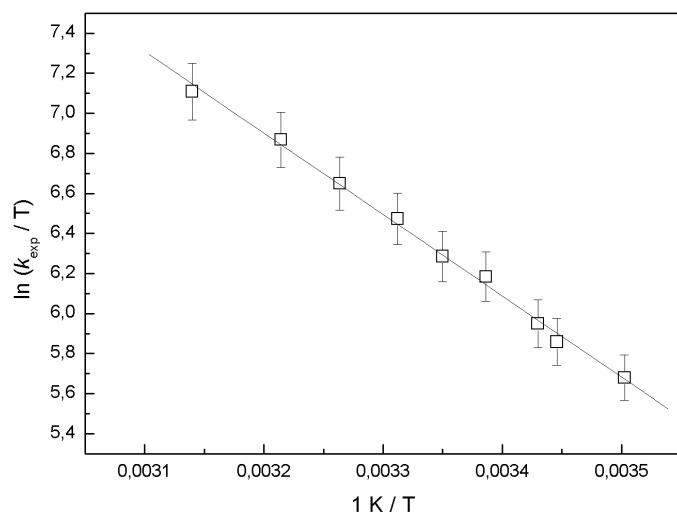

| T, K  | $10^5 k_{\text{exp}}, \text{M}^{-2}\text{s}^{-1}$ |
|-------|---------------------------------------------------|
| 285.5 | $0.84 \pm 0.01$                                   |
| 290.2 | $1.0 \pm 0.1$                                     |
| 291.5 | $1.1 \pm 0.1$                                     |
| 295.3 | $1.4 \pm 0.2$                                     |
| 298.2 | $1.6 \pm 0.2$                                     |
| 301.9 | $2.0 \pm 0.3$                                     |
| 306.4 | $2.4 \pm 0.3$                                     |
| 311.1 | $3.0 \pm 0.3$                                     |
| 318.5 | $3.9 \pm 0.4$                                     |

<sup>a</sup> Triplicate runs were averaged for each entry. The concentration of  $\text{OH}^-$  was computed from the pH, with  $K_w = 1.0 \times 10^{-14}$
